1 **Characterisation of the HIV-1 Molecular Epidemiology in Nigeria: Origin, Diversity,**  
2 **Demography and Geographic Spread**

3

4 Jamirah Nazziwa<sup>a</sup>, Nuno Faria<sup>b</sup>, Beth Chaplin<sup>c</sup>, Holly Rawizza<sup>c</sup>, Patrick Dakum<sup>d</sup>, Alash'le  
5 Abimiku<sup>d</sup>, Man Charurat<sup>d</sup>, Nicaise Ndembid<sup>d</sup> and Joakim Esbjörnsson<sup>a#</sup>

6

7 Department of Laboratory Medicine, Lund University, Lund, Sweden<sup>a</sup>

8 Department of Zoology, University of Oxford, Oxford, United Kingdom<sup>b</sup>

9 Department of Immunology and Infectious disease, Harvard T.H School of Public Health,  
10 Boston, USA<sup>c</sup>

11 Institute of Human Virology, Abuja, Nigeria<sup>d</sup>

12

13 Running head: HIV-1 Molecular epidemiology in Nigeria

14

15 #Address correspondence to:

16 Joakim Esbjörnsson

17 Systems Virology

18 Department of Laboratory Medicine

19 Lund University

20 BMC B13

21 221 84 Lund, Sweden

22 E-mail: joakim.esbjornsson@med.lu.se

1 **ABSTRACT**

2 Nigeria has been reported to have the highest number of AIDS-related deaths in the world.  
3 In this study, we aimed to determine the HIV-1 genetic diversity and phylodynamics in  
4 Nigeria. We analysed 1442 HIV-1 *pol* sequences collected 1999-2014 from four  
5 geopolitical zones in Nigeria. Phylogenetic analysis showed that the main circulating  
6 strains was the circulating recombinant strain (CRF) 02\_AG (44% of the analysed  
7 sequences), subtype G (8%), and CRF43\_02G (16%); and that these were introduced in  
8 Nigeria in the 1960s, 1970s and 1980s, respectively. The number of effective infections  
9 decreased in Nigeria after the introduction of free antiretroviral treatment in 2006. We also  
10 found a significant number of unique recombinant forms (22.7%). The majority of those  
11 were recombinants between two or three of the main circulating strains. Seven of those  
12 recombinants may represent novel CRFs. Finally, phylogeographic analysis suggested  
13 multiple occasions of HIV-1 transmissions between Lagos and Abuja (two of the main  
14 cities in Nigeria), that HIV-1 epidemic started in these cities, and then dispersed into rural  
15 areas.

## 1 **IMPORTANCE**

2 Nigeria has the second largest HIV-1 epidemic in the world with the highest number of  
3 AIDS-related deaths. The few previous reports have focused on local HIV-1 subtype/CRF  
4 distributions in different Nigerian regions, and the molecular epidemiology of HIV-1 in  
5 Nigeria as a whole is less well characterized. In this study, we describe the HIV-1  
6 spatiotemporal dynamics of the five dominating transmission clusters representing the  
7 main characteristics of the epidemiology. Our results may contribute to inform prevention  
8 strategies against further spread of HIV-1 in Nigeria.

## 1 INTRODUCTION

2 Thirty-seven years after the first AIDS cases were described<sup>1,2</sup>, HIV-1 is still a major public  
3 health problem that affects approximately 36.7 (30.8–42.9) million people globally<sup>3</sup>. Sub-  
4 Saharan Africa accounts for approximately 70% of all those infections. Nigeria, the most  
5 populous country in this region, has been ranked as the country with the highest number of  
6 AIDS-related deaths and the second highest number of HIV-1 infected cases in the world<sup>4,5</sup>.  
7 HIV-1 serological surveys in Nigeria were initiated in 1991, and an adult prevalence of  
8 1.8% (760,000) was reported<sup>6</sup>. This figure gradually increased to 5.8% in 2001 (2.6  
9 million), before declining to 2.9% in 2016 (3.1 million)<sup>3,6</sup>. Previous reports on circulating  
10 HIV-1 strains in Nigeria have identified subtype G and the circulating recombinant form  
11 (CRF) 02\_AG as the most common<sup>7-9</sup>. In addition, CRF43\_02G was recently shown to be  
12 highly prevalent in the capital Abuja<sup>10</sup>. However, estimates on the contribution of each  
13 strain to the Nigerian HIV-1 epidemic have varied considerably, with estimates of  
14 frequency varying between 22% and 50% for subtype G, and between 19% and 60% for  
15 CRF02\_AG<sup>8-15</sup>. These variations may be due to differences between geographic areas and  
16 transmission groups. A clearer picture of the HIV-1 subtype/CRF distributions in Nigeria  
17 is therefore warranted. In addition, it has been suggested that the genetic composition of  
18 the infecting HIV-1 strain may influence disease progression rate, probability and  
19 efficiency of transmission, interaction with the host, response to viral treatment and vaccine  
20 development<sup>16-23</sup>.

21

22 Advances in molecular biology techniques, databases, bioinformatics tools and expanded  
23 disease surveillance programs have provided an opportunity for scientists to conduct HIV-

1 1 epidemiological studies to understand the diversity, origin and transmission dynamics of  
2 HIV-1 by phylodynamic approaches<sup>24</sup>. Applying established epidemiological models on  
3 HIV-1 gene sequences in combination with data on time and location of sampling,  
4 epidemic growth rate, number of effective infections, timing, origin and dispersal of  
5 different HIV-1 lineages can be obtained<sup>24-26</sup>.

6

7 The objective of the current study was to characterize the molecular epidemiology of HIV-  
8 1 in Nigeria using a large dataset of *pol* sequences collected from 1999-2014.  
9 Phylodynamic approaches were employed to determine the HIV-1 diversity and to uncover  
10 the demographic history and the HIV-1 dissemination routes of the main circulating strains  
11 within Nigeria. This study increase the understanding of the Nigerian HIV-1 epidemic and  
12 may inform HIV-1 intervention strategies aiming at reducing the spread of HIV-1 in  
13 Nigeria.

## 1 MATERIALS AND METHODS

### 2 Sequence dataset

3 We analyzed 366 previously unpublished HIV-1 *pol* sequences (positions in HXB2  
4 K03455: 2253-3364) collected in Abuja, Nigeria from 2006-2011 together with all  
5 Nigerian *pol* sequences from the corresponding genetic region available in the Los Alamos  
6 HIV-1 sequence database (N=1076, April 2015, <http://www.hiv.lanl.gov/>, Table 1).  
7 Missing information on date and location of sampling was obtained through contact with  
8 relevant research centers.

### 10 Subtype determination

11 The Nigerian *pol* sequences were aligned with the 2010 All M group (A-K +  
12 Recombinants) reference sequence dataset (<http://www.hiv.lanl.gov/>) using the Clustal  
13 algorithm, followed by manual editing in MEGA6<sup>27,28</sup>. The HIV-1 subtype/CRF  
14 assignment was determined with maximum-likelihood (ML) phylogenetic analysis in Garli  
15 v0.98<sup>29</sup>, applying the General Time Reversible (GTR) substitution model to infer the ML  
16 phylogeny. Branch support was estimated using the approximate likelihood ratio test with  
17 the Shimodaira-Hasegawa-like procedure (aLRT-SH) as implemented in the PhyML 3.0<sup>30</sup>.  
18 Branches with aLRT-SH support >0.90 were considered statistically supported<sup>25</sup>.

### 20 Recombination analysis

21 Putative unique recombinant forms (URFs) and sequences that were difficult to type were  
22 analysed by Bootscan in Simplot<sup>31</sup>. Briefly, *pol* sequences were aligned with the LANL  
23 2010 HIV-1 reference subtypes for G, CRF4302G and CRF02AG (parental sequences).

1 Recombination breakpoints were identified using a sliding window size of 300 bp and step  
2 size of 50 bp.

3

4 In order to define the structure and distribution of the breakpoints across the alignment, we  
5 plotted a line graph of the relative frequency of the breakpoints. The K-means univariate-  
6 clustering algorithm as implemented in the ‘Ckmeans.1d.dp’ R package was used to define  
7 hotspots for recombination<sup>32</sup>. The gap statistic method implemented in the ‘factoextra’ R-  
8 package<sup>33</sup> was employed to estimate the groups based on similarity in breakpoint positions  
9 obtained from the Simplot analysis. The recombination hotspot positions were then used  
10 to identify groups of three or more URFs with one or more similar breakpoint positions.  
11 Finally, for the URFs to be defined as potential new CRFs, we performed a maximum  
12 likelihood phylogenetic analysis to assess the epidemiological relatedness among the  
13 sequences<sup>34</sup>.

14

### 15 **Cluster analysis**

16 A previously described BLAST approach was used to construct a reference sequence  
17 dataset for each subtype/CRF, separately<sup>25,35</sup>. Briefly, we initially constructed a reference  
18 set containing at least eight non-Nigerian sequences from the BLAST search of each  
19 sequence belonging to the different CRF/subtype group. Redundant sequences from each  
20 reference dataset were removed using an in-house Perl script and the Emboss 6.6.0.0  
21 package skip redundancy<sup>36</sup>. Nigerian transmission clusters were defined as clusters with  
22 aLRT-SH support >0.90 and  $\geq 80\%$  Nigerian sequences<sup>25,37</sup>. Clusters of two sequences  
23 were defined as dyads, 3-14 sequences as networks, and >14 sequences as large clusters<sup>38</sup>.

1

## 2 **Dating and Phylogeographic analysis**

3 The temporal signal in each dataset were assessed by TempEst using the transition-  
4 transversion versus divergence plots<sup>39</sup>. To determine informative substitution rate priors  
5 for analysis of the main transmission clusters in Nigeria, we randomly sampled 150  
6 sequences for each subtype/CRF, respectively. The evolutionary rates were estimated in  
7 BEAST v1.8<sup>40</sup> using the SRD06 model<sup>41</sup> with a relaxed uncorrelated lognormal clock  
8 model<sup>42,43</sup>. Markov chain Monte Carlo (MCMC) simulations were run for  $30 \times 10^7$  chain  
9 steps, subsampling parameters every 1000 steps. Convergence was assessed in Tracer.v.1.6  
10 (Effective Sample Sizes (ESS)  $\geq 100$ )<sup>44</sup>. Estimated subtype/CRF-specific evolutionary rates  
11 were then used as priors in the subsequent analyses.

12

13 We used a Bayesian discrete phylogeographic approach with a MCMC length of 300  
14 million steps in BEAST v1.8, sampling every 30,000<sup>th</sup> step, to reconstruct the spatial  
15 dynamics of HIV-1 for the large clusters identified<sup>40,45</sup>. BEAGLE was used to improve run  
16 time of likelihood calculations, and Tracer v1.6 was used to assess convergence of the runs  
17 (ESS  $\geq 100$ )<sup>44,46,47</sup>. The demographic history of the viral population, past growth rates, and  
18 effective population sizes were inferred using the Bayesian Skygrid model<sup>48</sup>. Priors for the  
19 TreeModel Root Height were estimated using the Bayesian Skyline model<sup>49</sup>. If applicable,  
20 detailed growth rates were estimated using the exponential growth rate model.

21

22 Symmetric and asymmetric continuous time Markov chain models were used to model the  
23 location exchange process and the parsimonious description of the location exchange rates



1 was inferred using the Bayesian stochastic search variable selection (BSSVS)  
2 procedure<sup>24,49,50</sup>. A robust counting approach as implemented in BEAST was used to  
3 estimate the forward and reverse viral movement events between locations along the  
4 branches of the posterior tree distributions<sup>51</sup>. Well-supported movements were summarized  
5 using SPREAD v1.0.7 based on a Bayes factor cut-off  $>3^{52-54}$ . The percentage of viral  
6 movements was summarized using R<sup>55</sup>.

7  
8 All files and scripts are available from the authors upon request.

## 9 10 **Statistics**

11 Linear by linear association test (LBL) was used to analyze trends over time, using IBM  
12 SPSS V22.0 Armonk, NY: IBM Corporation.

## 13 14 **Ethics**

15 Approvals were obtained from the local and national institutional review boards  
16 affiliated to the treatment sites and the international collaborating sites including the  
17 University of Maryland, Baltimore, Harvard University, University of Amsterdam and  
18 US center for diseases control.

## 1 **RESULTS**

2

### 3 **CRF02\_AG, CRF43\_02G and subtype G were the major circulating strains in Nigeria**

4 We analyzed 1442 HIV-1 *pol* sequences collected from four geopolitical zones in Nigeria  
5 between 1999 and 2013 (Table 1). The phylogenetic analysis showed that the CRF02\_AG  
6 was the most common strain (44% of the analyzed sequences), followed by CRF43\_02G  
7 (16%), subtype G (8%) and CRF06\_cpx (4%). A large proportion of the sequences (23%)  
8 were unique recombinant forms (URFs), whereas the remaining sequences were minor  
9 variants (each variant accounting for <2%).

10

11 Most sequences were from Abuja (697 sequences, 48%), followed by Lagos (346  
12 sequences, 23%) and Jos (216 sequences, 15%). The distribution of different  
13 subtypes/CRFs varied within these regions/states with fewer CRF02\_AG infections  
14 following a North East direction from Lagos (Figure 1). Analysis of trends over time  
15 showed an overall decrease in the proportion of CRF02\_AG infections in Nigeria (from  
16 55% in 2006 to 38% in 2013,  $p=0.015$ , LBL, Figure 2). Moreover, the analysis also showed  
17 an increase in the proportion of unique recombinant forms (URFs) from 16% to 32%, 2005-  
18 2009 ( $p=0.015$ , LBL).

19

### 20 **Four potential recombination hotspots in the *pol* region**

21 A detailed recombination analysis was performed on 210 of the 310 sequences classified  
22 as URFs. These sequences were initially selected from the maximum likelihood  
23 phylogenetic trees if they branched off close to the root between two and had long branches.

1 There were 655 breakpoint positions recorded among the 210 sequences, with some  
2 sequences having more than one breakpoint. These positions were plotted as a frequency  
3 plot of breakpoints along the alignment to identify hotspots for recombination  
4 (Supplementary Figure 1). Alignment positions around 285-315 (HXB2 K03455 positions:  
5 2538-2568), 503-534 (2756-2787), 720-775 (2973-3028) and 923-956 (3176-3209) were  
6 identified as potential recombination hotspots. To define these positions more precisely,  
7 we used the IQR of the optimal univariate K-median clustering algorithm with the number  
8 of K clusters determined by the gap-statistic method<sup>56</sup> (Supplementary Figure 2):  
9 Recombination hotspot I: 294-312 (HXB2 K03455 positions: 2547-2565); II: 503-533  
10 (2756-2786); III: 729-805 (2982-3058); and IV: 931-957 (3184-3210) (Supplementary  
11 Table 1). One-hundred-and-thirty-nine of the 210 (66%) sequences had a recombination  
12 breakpoint in the hotspot I region; 104/210 (50%) in hotspot II region; 58/210 (28%) in  
13 hotspot III region; and 59/210 (28%) in hotspot IV region. The hotspot positions were  
14 unique independent recombination events from the original breakpoint positions as  
15 previously identified for the parental sequences of CRF43\_02G (HXB2 K03455 positions:  
16 1266, 3325, and 6097) and CRF02\_AG (HXB2 K03455 positions: 2391, 3275, and 4175).  
17 We identified seven groups of URFs with 3-10 sequences with similar breakpoint positions  
18 (Supplementary Figure 6) and that were not epidemiologically linked.

19

## 20 **Cluster analysis**

21 To determine transmission clusters of the major circulating strains within Nigeria, we  
22 analyzed the three dominating forms CRF02\_AG, CRF43\_02G, and subtype G,  
23 respectively. In total, 206 subtype G sequences were analyzed (119 Nigerian and 87 non-

1 Nigerian). The phylogenetic analysis showed four dyads, one network, and one large  
2 Nigerian subtype G cluster (consisting of 81 Nigerian and 11 non-Nigerian sequences,  
3 Table 2 and Supplementary Figure 3). Analyses of the 1161 CRF02\_AG sequences (636  
4 Nigerian and 555 non-Nigerian, Supplementary Figure 4) resulted in 12 dyads, 12 networks  
5 and six clusters (Table 2). Finally, we analyzed 295 CRF43\_02G sequences (236 Nigerian  
6 and 59 non-Nigerian, Supplementary Figure 5) and all the Nigerian sequences clustered  
7 monophyletically (SH-aLRT=0.99). The majority of the reference sequences obtained by  
8 the BLAST approach did not cluster within the CRF43\_02G cluster, suggesting that  
9 CRF43\_02G mainly circulates in Nigeria.

10

#### 11 **Dating the origin of five main Nigerian transmission clusters**

12 To further dissect the Nigerian HIV-1 epidemic, we focused on the identified large  
13 Nigerian clusters; one subtype G, three CRF02\_AG and one CRF43\_02G clusters.  
14 Analysis of the temporal signal showed that all clusters had a correlation coefficient above  
15 0.3, indicating a positive correlation between genetic distance and sampling time, and thus  
16 retained sufficient phylogenetic signal to conduct coalescence analyses<sup>57</sup>.

17

18 The median time to most recent common ancestor (tMRCA) of the Nigerian subtype G  
19 cluster was estimated to 1979 (95% HPD: 1967-1980); the CRF02\_AG clusters to 1961  
20 (95% HPD: 1946-1974), 1968 (95% HPD: 1958-1978) and 1960 (95% HPD: 1946-1973)  
21 for cluster 1, 2 and 3, respectively; and the CRF43\_02G cluster to 1980 (95% HPD: 1975-  
22 1983) (Figure 3). The median HIV-1 evolutionary rates were estimated to  
23  $2.1 \times 10^{-3}$  substitutions/site/year (s/s/y) (95% HPD:  $1.7-2.5 \times 10^{-3}$  s/s/y) for the Nigerian

1 subtype G cluster;  $1.4 \times 10^{-3}$  s/s/y (95% HPD:  $1.1-1.9 \times 10^{-3}$  s/s/y),  $1.3 \times 10^{-3}$  s/s/y (95%  
2 HPD:  $1.4-1.8 \times 10^{-3}$  s/s/y),  $1.2 \times 10^{-3}$  s/s/y (95% HPD:  $0.9-1.6 \times 10^{-3}$  s/s/y) for the  
3 CRF02\_AG cluster 1,2 and 3, respectively; and  $4.2 \times 10^{-3}$  s/s/y (95% HPD:  $3.5-$   
4  $4.8 \times 10^{-3}$  s/s/y) for the CRF43\_02G cluster (Figure 3) .

5  
6 To control for bias in the phylogeographic analysis due to oversampling of some locations  
7 in the dataset in relation to what is reflected in the epidemic, we randomly selected  
8 sequences from different regions based on their HIV-1 prevalence and population growth  
9 over time in the different geographic regions. In these analyses, the median tMRCA of the  
10 Nigerian subtype G cluster was estimated to 1987 (95% HPD: 1982-1992); and the  
11 CRF02\_AG clusters to (95% HPD: 1960-1983), 1972 (95% HPD: 1973-1981), 1961 (95%  
12 HPD: 1952-1979) for cluster 1, 2 and 3, respectively.

#### 14 **Disentangling the demographic history of five main Nigerian transmission clusters**

15 The Bayesian Skygrid analysis indicated that the number of effective infections (i.e. the  
16 number of individuals contributing to new HIV-1 infections over time<sup>58</sup>) in the Nigerian  
17 subtype G epidemic underwent a fast exponential growth between the 1970s and the mid-  
18 1990s with an increase to 10,000 effective infections, followed by a marginal decrease with  
19 minor fluctuations from the mid-1990s (Figure 4). The median growth rate was 30% per  
20 year (95% HPD: 18%-42%). The three clusters representing the CRF02\_AG epidemic  
21 displayed a similar pattern with a slow increase in growth rate from the 1980s to 2000s.  
22 The median CRF02\_AG growth rates were estimated to 22% per year (95% HPD: 13%-  
23 32%) for cluster 1, 18% per year (95% HPD: 10%-26%) for cluster 2, and 24% (95% HPD:

1 11%-38%) for cluster 3. Finally, the CRF43\_02G cluster also showed an increase in  
2 effective HIV-1 infections from 1980 to 2000 (from 100 to 10,000 effective HIV-1  
3 infections), followed by a relatively sharp decrease from mid-2000 and forward (Figure 4).  
4 The median growth rate was 30% per year (95% HPD: 18%-42%).

## 6 **Phylogeographic dispersal of HIV-1 in five main Nigerian transmission clusters**

7 Next, we sought to investigate the spatio-temporal process of the HIV-1 spread in Nigeria  
8 using symmetric and asymmetric continuous time markov chain (CTMC) phylogeographic  
9 models with the BSSVS procedure in BEAST. The two models gave similar estimations.  
10 Results from the asymmetric analysis for subtype G showed a high statistical support for  
11 epidemiological linkage between Kaduna and other regions: Abuja (Bayes Factor  
12 [BF]=11302), Ibadan (BF=6), Yobe (BF=1609), and Jos (BF=11302). For CRF02\_AG  
13 clusters, Abuja was connected to Ibadan, Jos, Kaduna, Lagos, Oyo and Maiduguri (all BFs  
14 >4). Based on the posterior distribution of the location of origin, the most probable origin  
15 of Subtype G, CRF43\_02G and CRF02\_AG was Abuja (Posterior probability: 0.98).  
16 However, these results should be interpreted with caution due to the low number of  
17 sequences from some locations.

18  
19 Since the dataset contained unbalanced distribution of samples in terms of location, we  
20 conducted a control analysis to assess the robustness of our results to over-representations  
21 of samples from particular regions in Nigeria (Table 1). We selected samples based on  
22 population size and HIV-1 prevalence and run the CTMC analysis on the subsample. This  
23 analysis indicated that the most probable root state for all the strains where outside Nigeria.

1

## 2 **Rates of viral lineage migration**

3 The rates of viral lineage migration within Nigeria were estimated using a robust counting  
4 approach to infer the history of viral movements and epidemiological links between  
5 different locations and the locations that contributed most to the dispersal of HIV-1  
6 subtypes within Nigeria. For subtype G, HIV-1 dispersal from Abuja was estimated at 42%  
7 (95% HPD: 35-48%) and the highest viral migrations from Abuja were to Jos (17%, 95%  
8 HPD: 12-22%), outside Nigeria (10%, 95% HPD: 8-13%), and Lagos (7%, 95% HPD: 4-  
9 10%). Similar results were found for the CRF02\_AG clusters, except for slightly higher  
10 migration rates from Abuja to Lagos for cluster 1 (30%, 95% HPD: 25-34%, Figure 5).  
11 The CRF02\_AG dispersal from Abuja was estimated to 61%, 52% and 21% from cluster  
12 1, 2 and 3, respectively.

## 1 **DISCUSSION**

2 In this study, we aimed to provide a better understanding of the history and spread of the  
3 HIV-1 subtypes/CRFs circulating in Nigeria. We applied state of the art phylogenetic  
4 approaches on a large set of HIV-1 sequences from individuals of the five most populated  
5 geopolitical zones in Nigeria to characterize the Nigerian HIV-1 epidemic and to obtain  
6 new insights about its origin and disseminations patterns. In line with previous studies, we  
7 identified CRF02\_AG, CRF43\_02G and subtype G as the most prevalent strains (previous  
8 estimates ranging from 19-60% for CRF02\_AG<sup>8,9,11-13</sup> and 22-50% for subtype G<sup>9-11,14,15</sup>).  
9 The prevalence of CRF43\_02G has only been reported in one previous study from Abuja  
10 (estimated to 19%)<sup>10</sup>. These large variations and discrepancies are likely explained by  
11 analysis of local geographic regions, and that different subtyping tools differ in accuracy  
12 in assigning the correct subtype/CRF (CRFs are often particularly challenging)<sup>59</sup>. It could  
13 also be the result of a sampling not reflecting the real prevalence regions and/or over  
14 periods.

15

16 For both subtype G and CRF43\_02G, we found one well-supported monophyletic clade,  
17 respectively. Each clusters harbored the vast majority of the Nigerian sequences from those  
18 strains suggesting introductions by a single strain or a limited number of strains that grew  
19 out to dominate the epidemic. In contrast, three large Nigerian clusters were found for the  
20 CRF02\_AG strain indicating multiple introductions that grew out to separate sub-  
21 epidemics.

22



1 We observed one large transmission cluster with 68% of all Nigerian subtype G sequences  
2 and a coalescent estimate on the time of emergence at 1979 (1967-1980). This estimate is  
3 consistent with that subtype G cluster (GWA<sub>II</sub>) described by Delatorre *et al.* in 2014 and it  
4 is approximately six years before the first AIDS cases was identified Nigeria<sup>60</sup>. This  
5 indicates that HIV-1 had spread in Nigeria already before the first AIDS case was identified  
6 in the country. The three independent transmission clusters for CRF02\_AG that originated  
7 from within Nigeria had coalescent estimates on the time of emergence from 1960-1980.  
8 Our analysis indicated that the one of the CRF02\_AG cluster had an earlier origin than the  
9 estimated tMRCA for subtype G (i.e. the putative parental strain). This supports a previous  
10 study that CRF02\_AG is in fact the parental strain of subtype G<sup>61</sup>. Interestingly, the  
11 CRF43\_02G was first fully described and isolated in Saudi Arabia in 2008<sup>62</sup>. Our analysis  
12 indicated that it emerged in Abuja already in the early 1980's. In addition, the majority of  
13 the CRF43\_02G strains in Genbank was of Nigerian origin. Considering the large  
14 prevalence of both the putative parental strains CRF02\_AG and subtype G, it is therefore  
15 plausible that CRF43\_02G first emerged in Nigeria. The molecular clock estimates on the  
16 date of introduction, from the control analysis accounting for the sampling bias,  
17 corresponded well with all the five clusters. This implies that the sampling location had  
18 limited effect on these estimations.

19

20 The demographic analysis indicated an increase in number of effective infections 1970-  
21 1995 in all five clusters. This is in line with a rapid population growth during the same  
22 period in Nigeria (from 56 to 108 million people, [www.worldometers.info/world-](http://www.worldometers.info/world-population/nigeria-population)  
23 [population/nigeria-population](http://www.worldometers.info/world-population/nigeria-population)). Moreover, this increase was followed by a decline in

1 number of effective infections which seem to coincide with when free ART was introduced  
2 in 2006<sup>6</sup>, and when Nigeria registered a sharp decrease in HIV-1 prevalence (from  
3 approximately 6% to 3%)<sup>3,6</sup>. However, despite this decrease in HIV-1 prevalence, our  
4 analysis indicated a relatively high number of co-circulating strains. Our analysis also  
5 indicated that urban areas like Abuja and Lagos might represent major hubs of HIV-1  
6 transmissions.

7  
8 The recombination analysis indicated several URFs and potentially novel CRFs. Inter-  
9 subtype/CRF recombination does not occur randomly on the HIV-1 genome as its  
10 frequency varies over the genome with several so-called hotspots for recombination<sup>63,64</sup>.  
11 One main hotspot for recombination in the *pol* region (found in 105 sequences) was close  
12 to the *pol PR-RT* border (positions 2547-2565 in the HIV-1 HXB2 reference genome,  
13 K03455). This hotspot has previously been reported in a study on HIV-1 subtype B<sup>65</sup>. The  
14 hotspot positions II and IV has also been reported elsewhere<sup>66</sup>. The seven identified groups  
15 of URFs represents potential novel CRFs circulating in Nigeria or second generation  
16 recombinants with different recombination patterns. However, this needs to be confirmed  
17 by full-length sequencing. To date, 18 distinct subtype G related CRFs have been described  
18 and published worldwide indicating the diversity in Subtype G sequences  
19 (<http://www.hiv.lanl.gov/>).

20

21 This is the first study to dissecting the Nigerian molecular epidemiology with a country-  
22 wide set of HIV-1 sequences. Understanding the underlying processes and factors that  
23 influence HIV-1 transmission, demographic history and migration patterns are pivotal to

- 1 understand the epidemic potential of different HIV-1 strains. Ultimately, this may also
- 2 inform population-based surveillance of infectious diseases.

1 **NOTES**

2 **Acknowledgments**

3 We thank all the study participants and the collaborating health centers in Nigeria.

4

5 **Author contributions**

6 J.N, N.N and J.E. interpreted the data and were responsible for the overall study design.

7 N.N and J.E. were responsible for the overall project coordination. H.R., B.C., P.D, A.A,

8 M.C were medically and organisationally responsible for the clinical sites and collected

9 key epidemiological data of the study participants. J.N, N.F. and J.E analysed the data and

10 contributed in statistical analyses. J.N. and J.E. wrote the manuscript. All authors read and

11 approved the manuscript.

12

13 **Conflicts of interest**

14 The authors or their institutions declare no competing financial interests, and did not at any

15 time receive payment or services from a third party (government, commercial, private

16 foundation, etc.) for any aspect of the submitted work (including data monitoring board,

17 study design, manuscript preparation, statistical analysis, etc.). The authors have no

18 patents, whether planned, pending or issued, broadly relevant to the work.

19

20 **Funding information**

- 1 The study was supported by the Swedish Research Council (No. 350-2012-6628 and 2016-
- 2 01417), Swedish Society of Medical Research (SA-2016), and the Medical Faculty at
- 3 Lund University.

## 1 REFERENCES

- 2
- 3 1. Gottlieb MS, Schroff R, Schanker HM, et al. Pneumocystis carinii pneumonia and  
4 mucosal candidiasis in previously healthy homosexual men: evidence of a new acquired  
5 cellular immunodeficiency. *The New England journal of medicine* 1981; **305**(24): 1425-  
6 31.
- 7 2. Pneumocystis Pneumonia &#x2014; Los Angeles. *Morbidity and Mortality Weekly*  
8 *Report* 1981; **30**(21): 250-2.
- 9 3. UNAIDS. UNAIDS, “Global Reports - UNAIDS report on the global AIDS  
10 epidemic 2016, 2017.
- 11 4. Granich R, Gupta S, Hersh B, et al. Trends in AIDS Deaths, New Infections and  
12 ART Coverage in the Top 30 Countries with the Highest AIDS Mortality Burden; 1990-  
13 2013. *PloS one* 2015; **10**(7): e0131353.
- 14 5. UNAIDS. UNAIDS DATA 2018. 2018.
- 15 6. (NACA) NAFTCOA. Global AIDS Response Country Progress report Nigeria  
16 GARPR 2015, 2015.
- 17 7. Ajoge HO, Gordon ML, Ibrahim S, Shittu OS, Ndung'u T, Olonitola SO. Drug  
18 resistance pattern of HIV type 1 isolates sampled in 2007 from therapy-naive pregnant  
19 women in North-Central Nigeria. *AIDS research and human retroviruses* 2012; **28**(1): 115-  
20 8.
- 21 8. Imade GE, Sagay AS, Chaplin B, et al. Short communication: Transmitted HIV  
22 drug resistance in antiretroviral-naive pregnant women in north central Nigeria. *AIDS*  
23 *research and human retroviruses* 2014; **30**(2): 127-33.
- 24 9. Volz EM, Ndembu N, Nowak R, et al. Phylodynamic analysis to inform prevention  
25 efforts in mixed HIV epidemics. *Virus evolution* 2017; **3**(2): vex014.
- 26 10. Diallo K, Zheng DP, Rottinghaus EK, Basse O, Yang C. Viral Genetic Diversity  
27 and Polymorphisms in a Cohort of HIV-1-Infected Patients Eligible for Initiation of  
28 Antiretroviral Therapy in Abuja, Nigeria. *AIDS research and human retroviruses* 2015;  
29 **31**(5): 564-75.
- 30 11. Chaplin B, Eisen G, Idoko J, et al. Impact of HIV type 1 subtype on drug resistance  
31 mutations in Nigerian patients failing first-line therapy. *AIDS research and human*  
32 *retroviruses* 2011; **27**(1): 71-80.
- 33 12. Mamadou S, Montavon C, Ben A, et al. Predominance of CRF02-AG and CRF06-  
34 cpx in Niger, West Africa. *AIDS research and human retroviruses* 2002; **18**(10): 723-6.
- 35 13. Ojesina AI, Sankale JL, Odaibo G, et al. Subtype-specific patterns in HIV Type 1  
36 reverse transcriptase and protease in Oyo State, Nigeria: implications for drug resistance  
37 and host response. *AIDS research and human retroviruses* 2006; **22**(8): 770-9.
- 38 14. Ajoge HO, Gordon ML, de Oliveira T, et al. Genetic characteristics, coreceptor  
39 usage potential and evolution of Nigerian HIV-1 subtype G and CRF02\_AG isolates. *PloS*  
40 *one* 2011; **6**(3): e17865.
- 41 15. Hamers RL, Wallis CL, Kityo C, et al. HIV-1 drug resistance in antiretroviral-naive  
42 individuals in sub-Saharan Africa after rollout of antiretroviral therapy: a multicentre  
43 observational study. *The Lancet Infectious diseases* 2011; **11**(10): 750-9.
- 44 16. Palm AA, Esbjornsson J, Mansson F, et al. Faster progression to AIDS and AIDS-  
45 related death among seroincident individuals infected with recombinant HIV-1

- 1 A3/CRF02\_AG compared with sub-subtype A3. *The Journal of infectious diseases* 2014;
- 2 **209**(5): 721-8.
- 3 17. Naidoo VL, Mann JK, Noble C, et al. Mother-to-Child HIV Transmission
- 4 Bottleneck Selects for Consensus Virus with Lower Gag-Protease-Driven Replication
- 5 Capacity. *Journal of virology* 2017; **91**(17).
- 6 18. Laher F, Ranasinghe S, Porichis F, et al. HIV Controllers Exhibit Enhanced
- 7 Frequencies of Major Histocompatibility Complex Class II Tetramer(+) Gag-Specific
- 8 CD4(+) T Cells in Chronic Clade C HIV-1 Infection. *Journal of virology* 2017; **91**(7).
- 9 19. Kiwanuka N, Robb M, Laeyendecker O, et al. HIV-1 viral subtype differences in
- 10 the rate of CD4+ T-cell decline among HIV seroincident antiretroviral naive persons in
- 11 Rakai district, Uganda. *J Acquir Immune Defic Syndr* 2010; **54**(2): 180-4.
- 12 20. Baeten JM, Chohan B, Lavreys L, et al. HIV-1 subtype D infection is associated
- 13 with faster disease progression than subtype A in spite of similar plasma HIV-1 loads. *The*
- 14 *Journal of infectious diseases* 2007; **195**(8): 1177-80.
- 15 21. Senkaali D, Muwonge R, Morgan D, Yirrell D, Whitworth J, Kaleebu P. The
- 16 relationship between HIV type 1 disease progression and V3 serotype in a rural Ugandan
- 17 cohort. *AIDS research and human retroviruses* 2004; **20**(9): 932-7.
- 18 22. Kaleebu P, Ross A, Morgan D, et al. Relationship between HIV-1 Env subtypes A
- 19 and D and disease progression in a rural Ugandan cohort. *AIDS (London, England)* 2001;
- 20 **15**(3): 293-9.
- 21 23. Kanki PJ, Hamel DJ, Sankale JL, et al. Human immunodeficiency virus type 1
- 22 subtypes differ in disease progression. *The Journal of infectious diseases* 1999; **179**(1): 68-
- 23 73.
- 24 24. Faria NR, Rambaut A, Suchard MA, et al. HIV epidemiology. The early spread and
- 25 epidemic ignition of HIV-1 in human populations. *Science (New York, NY)* 2014;
- 26 **346**(6205): 56-61.
- 27 25. Esbjornsson J, Mild M, Audelin A, et al. HIV-1 transmission between MSM and
- 28 heterosexuals, and increasing proportions of circulating recombinant forms in the Nordic
- 29 Countries. *Virus evolution* 2016; **2**(1): vew010.
- 30 26. Hassan AS, Pybus OG, Sanders EJ, Albert J, Esbjornsson J. Defining HIV-1
- 31 transmission clusters based on sequence data. *AIDS (London, England)* 2017; **31**(9): 1211-
- 32 22.
- 33 27. Larkin MA, Blackshields G, Brown NP, et al. Clustal W and Clustal X version 2.0.
- 34 *Bioinformatics (Oxford, England)* 2007; **23**(21): 2947-8.
- 35 28. Tamura K, Stecher G, Peterson D, Filipinski A, Kumar S. MEGA6: Molecular
- 36 Evolutionary Genetics Analysis version 6.0. *Molecular biology and evolution* 2013;
- 37 **30**(12): 2725-9.
- 38 29. Zwickl DJ. Genetic algorithm approaches for the phylogenetic analysis of large
- 39 biological sequence datasets under the maximum likelihood criterion.: The University of
- 40 Texas at Austin.; 2006.
- 41 30. Guindon S, Dufayard JF, Lefort V, Anisimova M, Hordijk W, Gascuel O. New
- 42 algorithms and methods to estimate maximum-likelihood phylogenies: assessing the
- 43 performance of PhyML 3.0. *Systematic biology* 2010; **59**(3): 307-21.
- 44 31. Lole KS, Bollinger RC, Paranjape RS, et al. Full-length human immunodeficiency
- 45 virus type 1 genomes from subtype C-infected seroconverters in India, with evidence of
- 46 intersubtype recombination. *Journal of virology* 1999; **73**(1): 152-60.

- 1 32. Wang H, Song M. Ckmeans.1d.dp: Optimal k-means Clustering in One Dimension  
2 by Dynamic Programming. *The R journal* 2011; **3**(2): 29-33.
- 3 33. Kassambara A. factoextra : Extract and Visualize the Results of Multivariate Data  
4 Analyses. 2017. <http://www.sthda.com/english/rpkgs/factoextra/>.
- 5 34. Robertson DL, Anderson JP, Bradac JA, et al. HIV-1 Nomenclature Proposal.  
6 *Science (New York, NY)* 2000; **288**(5463): 55-.
- 7 35. Altschul SF, Gish W, Miller W, Myers EW, Lipman DJ. Basic local alignment  
8 search tool. *Journal of molecular biology* 1990; **215**(3): 403-10.
- 9 36. J I. skipredundant. [http://www.bioinformatics.nl/cgi-](http://www.bioinformatics.nl/cgi-bin/emboss/help/skipredundant)  
10 [bin/emboss/help/skipredundant](http://www.bioinformatics.nl/cgi-bin/emboss/help/skipredundant).
- 11 37. Anisimova M, Gil M, Dufayard JF, Dessimoz C, Gascuel O. Survey of branch  
12 support methods demonstrates accuracy, power, and robustness of fast likelihood-based  
13 approximation schemes. *Systematic biology* 2011; **60**(5): 685-99.
- 14 38. Aldous JL, Pond SK, Poon A, et al. Characterizing HIV transmission networks  
15 across the United States. *Clinical infectious diseases : an official publication of the*  
16 *Infectious Diseases Society of America* 2012; **55**(8): 1135-43.
- 17 39. Rambaut A, Lam TT, Max Carvalho L, Pybus OG. Exploring the temporal structure  
18 of heterochronous sequences using TempEst (formerly Path-O-Gen). *Virus evolution* 2016;  
19 **2**(1): vew007-vew.
- 20 40. Drummond AJ, Suchard MA, Xie D, Rambaut A. Bayesian phylogenetics with  
21 BEAUti and the BEAST 1.7. *Molecular biology and evolution* 2012; **29**(8): 1969-73.
- 22 41. Shapiro B, Rambaut A, Drummond AJ. Choosing appropriate substitution models  
23 for the phylogenetic analysis of protein-coding sequences. *Molecular biology and*  
24 *evolution* 2006; **23**(1): 7-9.
- 25 42. Kishino H, Thorne JL, Bruno WJ. Performance of a divergence time estimation  
26 method under a probabilistic model of rate evolution. *Molecular biology and evolution*  
27 2001; **18**(3): 352-61.
- 28 43. Thorne JL, Kishino H, Painter IS. Estimating the rate of evolution of the rate of  
29 molecular evolution. *Molecular biology and evolution* 1998; **15**(12): 1647-57.
- 30 44. Rambaut A, Suchard MA, Xie D, Drummond AJ. Tracer v1.6, Available from  
31 <http://tree.bio.ed.ac.uk/software/tracer/>. 2014.
- 32 45. Lemey P, Rambaut A, Welch JJ, Suchard MA. Phylogeography takes a relaxed  
33 random walk in continuous space and time. *Molecular biology and evolution* 2010; **27**(8):  
34 1877-85.
- 35 46. Ayres DL, Darling A, Zwickl DJ, et al. BEAGLE: an application programming  
36 interface and high-performance computing library for statistical phylogenetics. *Systematic*  
37 *biology* 2012; **61**(1): 170-3.
- 38 47. Suchard MA, Rambaut A. Many-core algorithms for statistical phylogenetics.  
39 *Bioinformatics (Oxford, England)* 2009; **25**(11): 1370-6.
- 40 48. Baele G, Lemey P, Bedford T, Rambaut A, Suchard MA, Alekseyenko AV.  
41 Improving the accuracy of demographic and molecular clock model comparison while  
42 accommodating phylogenetic uncertainty. *Molecular biology and evolution* 2012; **29**(9):  
43 2157-67.
- 44 49. Drummond AJ, Rambaut A, Shapiro B, Pybus OG. Bayesian coalescent inference  
45 of past population dynamics from molecular sequences. *Molecular biology and evolution*  
46 2005; **22**(5): 1185-92.



- 1 50. Lemey P, Rambaut A, Drummond AJ, Suchard MA. Bayesian phylogeography  
2 finds its roots. *PLoS computational biology* 2009; **5**(9): e1000520.
- 3 51. Minin VN, Suchard MA. Counting labeled transitions in continuous-time Markov  
4 models of evolution. *Journal of mathematical biology* 2008; **56**(3): 391-412.
- 5 52. Bielejec F, Rambaut A, Suchard MA, Lemey P. SPREAD: spatial phylogenetic  
6 reconstruction of evolutionary dynamics. *Bioinformatics (Oxford, England)* 2011; **27**(20):  
7 2910-2.
- 8 53. Drummond AJ, Bouckaert RR. Bayesian evolutionary analysis with BEAST.  
9 Cambridge University Press.; 2017.
- 10 54. Kass RE, Raftery AE. Bayes Factors. *Journal of the American Statistical*  
11 *Association* 1995; **90**(430): 773-95.
- 12 55. Team RC. R: A language and environment for statistical computing. R Foundation  
13 for Statistical Computing, Vienna, Austria. URL <http://www.R-project.org/>. 2013.
- 14 56. Robert T, Guenther W, Trevor H. Estimating the number of clusters in a data set  
15 via the gap statistic. *Journal of the Royal Statistical Society: Series B (Statistical*  
16 *Methodology)* 2001; **63**(2): 411-23.
- 17 57. Rambaut A, Lam TT, Max Carvalho L, Pybus OG. Exploring the temporal structure  
18 of heterochronous sequences using TempEst (formerly Path-O-Gen). *Virus evolution* 2016;  
19 **2**(1): vew007.
- 20 58. Gill MS, Lemey P, Faria NR, Rambaut A, Shapiro B, Suchard MA. Improving  
21 Bayesian population dynamics inference: a coalescent-based model for multiple loci.  
22 *Molecular biology and evolution* 2013; **30**(3): 713-24.
- 23 59. Pineda-Pena AC, Faria NR, Imbrechts S, et al. Automated subtyping of HIV-1  
24 genetic sequences for clinical and surveillance purposes: performance evaluation of the  
25 new REGA version 3 and seven other tools. *Infection, genetics and evolution : journal of*  
26 *molecular epidemiology and evolutionary genetics in infectious diseases* 2013; **19**: 337-48.
- 27 60. Delatorre E, Mir D, Bello G. Spatiotemporal dynamics of the HIV-1 subtype G  
28 epidemic in West and Central Africa. *PloS one* 2014; **9**(2): e98908.
- 29 61. Abecasis AB, Lemey P, Vidal N, et al. Recombination confounds the early  
30 evolutionary history of human immunodeficiency virus type 1: subtype G is a circulating  
31 recombinant form. *Journal of virology* 2007; **81**(16): 8543-51.
- 32 62. Yamaguchi J, Badreddine S, Swanson P, Bodelle P, Devare SG, Brennan CA.  
33 Identification of new CRF43\_02G and CRF25\_cpx in Saudi Arabia based on full genome  
34 sequence analysis of six HIV type 1 isolates. *AIDS research and human retroviruses* 2008;  
35 **24**(10): 1327-35.
- 36 63. Zhuang J, Jetzt AE, Sun G, et al. Human immunodeficiency virus type 1  
37 recombination: rate, fidelity, and putative hot spots. *Journal of virology* 2002; **76**(22):  
38 11273-82.
- 39 64. Magiorkinis G, Paraskevis D, Vandamme AM, Magiorkinis E, Sypsa V, Hatzakis  
40 A. In vivo characteristics of human immunodeficiency virus type 1 intersubtype  
41 recombination: determination of hot spots and correlation with sequence similarity. *J Gen*  
42 *Virol* 2003; **84**(Pt 10): 2715-22.
- 43 65. Galli A, Lai A, Corvasce S, et al. Recombination analysis and structure prediction  
44 show correlation between breakpoint clusters and RNA hairpins in the pol gene of human  
45 immunodeficiency virus type 1 unique recombinant forms. *J Gen Virol* 2008; **89**(Pt 12):  
46 3119-25.

- 1 66. Smyth RP, Schlub TE, Grimm AJ, et al. Identifying recombination hot spots in the
- 2 HIV-1 genome. *Journal of virology* 2014; **88**(5): 2891-902.
- 3

## TABLES

**Table 1. Proportion of subtype/CRF in the Nigerian dataset of previously published and new sequences collected in the period 1999-2013**

| Subtype/CRF      | N           | %          | Geography  |           |          |          |           |          |            |               |            |          |           |            |                         |          |           |          |          |          |           |    |
|------------------|-------------|------------|------------|-----------|----------|----------|-----------|----------|------------|---------------|------------|----------|-----------|------------|-------------------------|----------|-----------|----------|----------|----------|-----------|----|
|                  |             |            | Southwest  |           |          |          |           |          |            | North Central |            |          |           |            | North East & North West |          |           |          |          |          |           |    |
|                  |             |            | LAG        | IBA       | OND      | OSU      | OYO       | ENU      | TOTAL      | ABV           | JOS        | NIG      | NC        | TOTAL      | KAD                     | YOB      | MAI       | KAN      | ADA      | BOR      | TOTAL     |    |
| <b>A1</b>        | 24          | 1.7        | 9          | 2         | 0        | 0        | 0         | 0        | 11         | 7             | 5          | 0        | 0         | 12         | 0                       | 0        | 1         | 0        | 0        | 0        | 1         |    |
| <b>B</b>         | 4           | 0.3        | 1          | 1         | 0        | 0        | 0         | 0        | 2          | 2             | 0          | 0        | 0         | 2          | 0                       | 0        | 0         | 0        | 0        | 0        | 0         | 0  |
| <b>C</b>         | 14          | 1.0        | 2          | 1         | 0        | 0        | 2         | 0        | 5          | 6             | 2          | 0        | 1         | 9          | 0                       | 0        | 0         | 0        | 0        | 0        | 0         | 0  |
| <b>CRF02_AG</b>  | 636         | 44.1       | 176        | 27        | 0        | 1        | 18        | 0        | 222        | 284           | 94         | 0        | 10        | 388        | 13                      | 0        | 11        | 2        | 0        | 0        | 0         | 26 |
| <b>CRF06_cpx</b> | 64          | 4.4        | 18         | 2         | 0        | 0        | 0         | 0        | 20         | 36            | 6          | 0        | 1         | 43         | 0                       | 0        | 1         | 0        | 0        | 0        | 0         | 1  |
| <b>CRF09_cpx</b> | 1           | 0.1        | 0          | 1         | 0        | 0        | 0         | 0        | 1          | 0             | 0          | 0        | 0         | 0          | 0                       | 0        | 0         | 0        | 0        | 0        | 0         | 0  |
| <b>CRF11_cpx</b> | 4           | 0.3        | 1          | 0         | 0        | 0        | 0         | 0        | 1          | 2             | 1          | 0        | 0         | 3          | 0                       | 0        | 0         | 0        | 0        | 0        | 0         | 0  |
| <b>CRF18_cpx</b> | 1           | 0.1        | 1          | 0         | 0        | 0        | 0         | 0        | 1          | 0             | 0          | 0        | 0         | 0          | 0                       | 0        | 0         | 0        | 0        | 0        | 0         | 0  |
| <b>CRF19_cpx</b> | 1           | 0.1        | 0          | 0         | 0        | 0        | 0         | 0        | 0          | 0             | 1          | 0        | 0         | 1          | 0                       | 0        | 0         | 0        | 0        | 0        | 0         | 0  |
| <b>CRF43_02G</b> | 236         | 16.4       | 33         | 11        | 1        | 0        | 0         | 0        | 45         | 138           | 34         | 0        | 0         | 172        | 8                       | 0        | 8         | 3        | 0        | 0        | 0         | 19 |
| <b>CRF49_cpx</b> | 1           | 0.1        | 1          | 0         | 0        | 0        | 0         | 0        | 1          | 0             | 0          | 0        | 0         | 0          | 0                       | 0        | 0         | 0        | 0        | 0        | 0         | 0  |
| <b>D</b>         | 9           | 0.6        | 2          | 0         | 0        | 0        | 0         | 0        | 2          | 4             | 2          | 0        | 0         | 6          | 0                       | 0        | 1         | 0        | 0        | 0        | 0         | 1  |
| <b>G</b>         | 119         | 8.3        | 24         | 6         | 0        | 0        | 0         | 0        | 30         | 55            | 25         | 1        | 0         | 81         | 4                       | 1        | 2         | 0        | 0        | 0        | 1         | 8  |
| <b>URF</b>       | 328         | 22.7       | 78         | 13        | 0        | 0        | 2         | 1        | 94         | 163           | 46         | 0        | 3         | 212        | 9                       | 0        | 11        | 0        | 2        | 0        | 0         | 22 |
| <b>Total</b>     | <b>1442</b> | <b>100</b> | <b>346</b> | <b>64</b> | <b>1</b> | <b>1</b> | <b>22</b> | <b>1</b> | <b>435</b> | <b>697</b>    | <b>216</b> | <b>1</b> | <b>15</b> | <b>929</b> | <b>34</b>               | <b>1</b> | <b>35</b> | <b>5</b> | <b>2</b> | <b>1</b> | <b>78</b> |    |

N, number of sequences; LAG, Lagos; IBA, Ibadan; OND, Ondu; OSU, Osun; ENU, Enugu; ABV, Abuja; NIG, Niger; NC, Other North central areas; KAD, Kaduna; YOB, Yobe; MAI, Maiduguri; KAN, Kanu; ADA, Adamawa; BOR, Borno

1 **Table 2. Number of clusters in the different subtype / CRF groups**

| <b>Subtype / CRF</b> | <b>Dyads<sup>a</sup></b> | <b>Networks<sup>b</sup></b> | <b>Large clusters<sup>c</sup></b> | <b>Total</b> |
|----------------------|--------------------------|-----------------------------|-----------------------------------|--------------|
| G                    | 8 (4)                    | 8 (2)                       | 94 (1)                            | 104          |
| CRF02_AG             | 24 (12)                  | 76 (12)                     | 336 (6)                           | 439          |
| CRF43_02G            | 0 (0)                    | 0 (0)                       | 295 (1)                           | 295          |
| <b>Total</b>         | <b>32</b>                | <b>84</b>                   | <b>725</b>                        | <b>841</b>   |

<sup>a</sup>Dyads: Clusters of 2 sequences

<sup>b</sup>Networks: Clusters of 3-14 sequences

<sup>c</sup>Large clusters: Clusters with more than 14 sequences

The brackets ( ) indicates the number of clusters observed for the different groups.

2

1 **FIGURE LEGENDS**

2 **Figure 1. Prevalence of subtypes/CRFs among HIV-1 infected individuals collected**  
3 **from different locations in Nigeria.**

4 Molecular diversity of HIV-1 in different zones/regions in Nigeria. The location of the  
5 sampled regions are shown by the black dot with a line leading to diversity pie-chart for  
6 the city in that particular region. The colors in the pie-chart are defined in the key.  
7 Abbreviations for the towns: ABV, Abuja; KAD, Kaduna; MAI, Maiduguri; LAG, Lagos;  
8 IBA, Ibadan (Based on the map from <https://d-maps.com/> ).

9  
10 **Figure 2. Dynamics of subtype/ CRF proportions, ART coverage and overall country**  
11 **HIV-1 prevalence over time.**

12 The subtype/ CRF proportion displayed as overall percentage of sequences collected from  
13 Nigeria per year. Few sequences (< 20 per year) were collected from 1999-2004 and their  
14 proportions had no effect on the LBL association tests. No sequences were collected in  
15 2012. The orange bars represent the proportion of HIV-1 infected individuals that were  
16 receiving ART in the respective years. The change in proportion of different  
17 subtypes/CRFs over time was not significant for subtype G ( $p = 0.711$ , LBL), CRF43\_02G  
18 ( $p = 0.497$ , LBL), CRF02\_AG ( $p = 0.323$ , LBL) and CRF06\_cpx ( $p = 0.015$ , LBL).  
19 However the increase of URFs over time was significant ( $p = 0.015$ , LBL). The y-axis  
20 shows the proportions (%) of sequences collected over time for a particular subtype/CRF  
21 or the proportion (%) of patients receiving ART. The x-axis represents the time period in  
22 years from 1999-2013. The z-axis shows the HIV-1 prevalence in Nigeria over time.

23

1 **Figure 3. Demographic history for the different Nigerian clusters**

2 Pirate plots for the evolutionary rate and time to the most recent common ancestor since  
3 2013 for the different 5 clusters in Nigeria. Each bean in the plot has mean indicated as a  
4 bold horizontal black line and the Bayesian 95% highest density interval as thin horizontal  
5 lines. The raw data from the sampling interval during Bayesian analysis is indicated by  
6 black dots inside the beans. The CRF43\_02G had a slightly higher evolutionary rate  
7 compared to the other clusters.

8

9 **Figure 4. Skygrid plots for the different clusters**

10 Phylodynamic analyses of HIV-1 *pol* gene for subtype G, CRF02\_AG, CRF43\_02G  
11 clusters isolated in Nigeria. Bayesian skygrid plots representing the changes in the effective  
12 population size of the virus ( $N_e$ )(log) over time. The solid lines represent the estimated  
13 median log effective population size and the gray shaded areas represents the 95% HPD  
14 intervals.

15

16 **Figure 5. Estimated percentages of CRF02\_AG migration events from Abuja to each**  
17 **location in the NG, obtained using cluster 1**

18 The density plot for the viral movements from the Abuja (most probable root location) to  
19 Lagos, Jos, Kaduna and other towns. Lagos and Jos had the highest percentage of viral  
20 movements from Abuja for the CRF02\_AG Cluster 1. Infections from outside Nigeria  
21 accounted for 10% of the viral movement.

1 FIGURES

2 Figure 1. Prevalence of subtypes/CRFs among HIV-1 infected individuals collected from different locations in Nigeria.

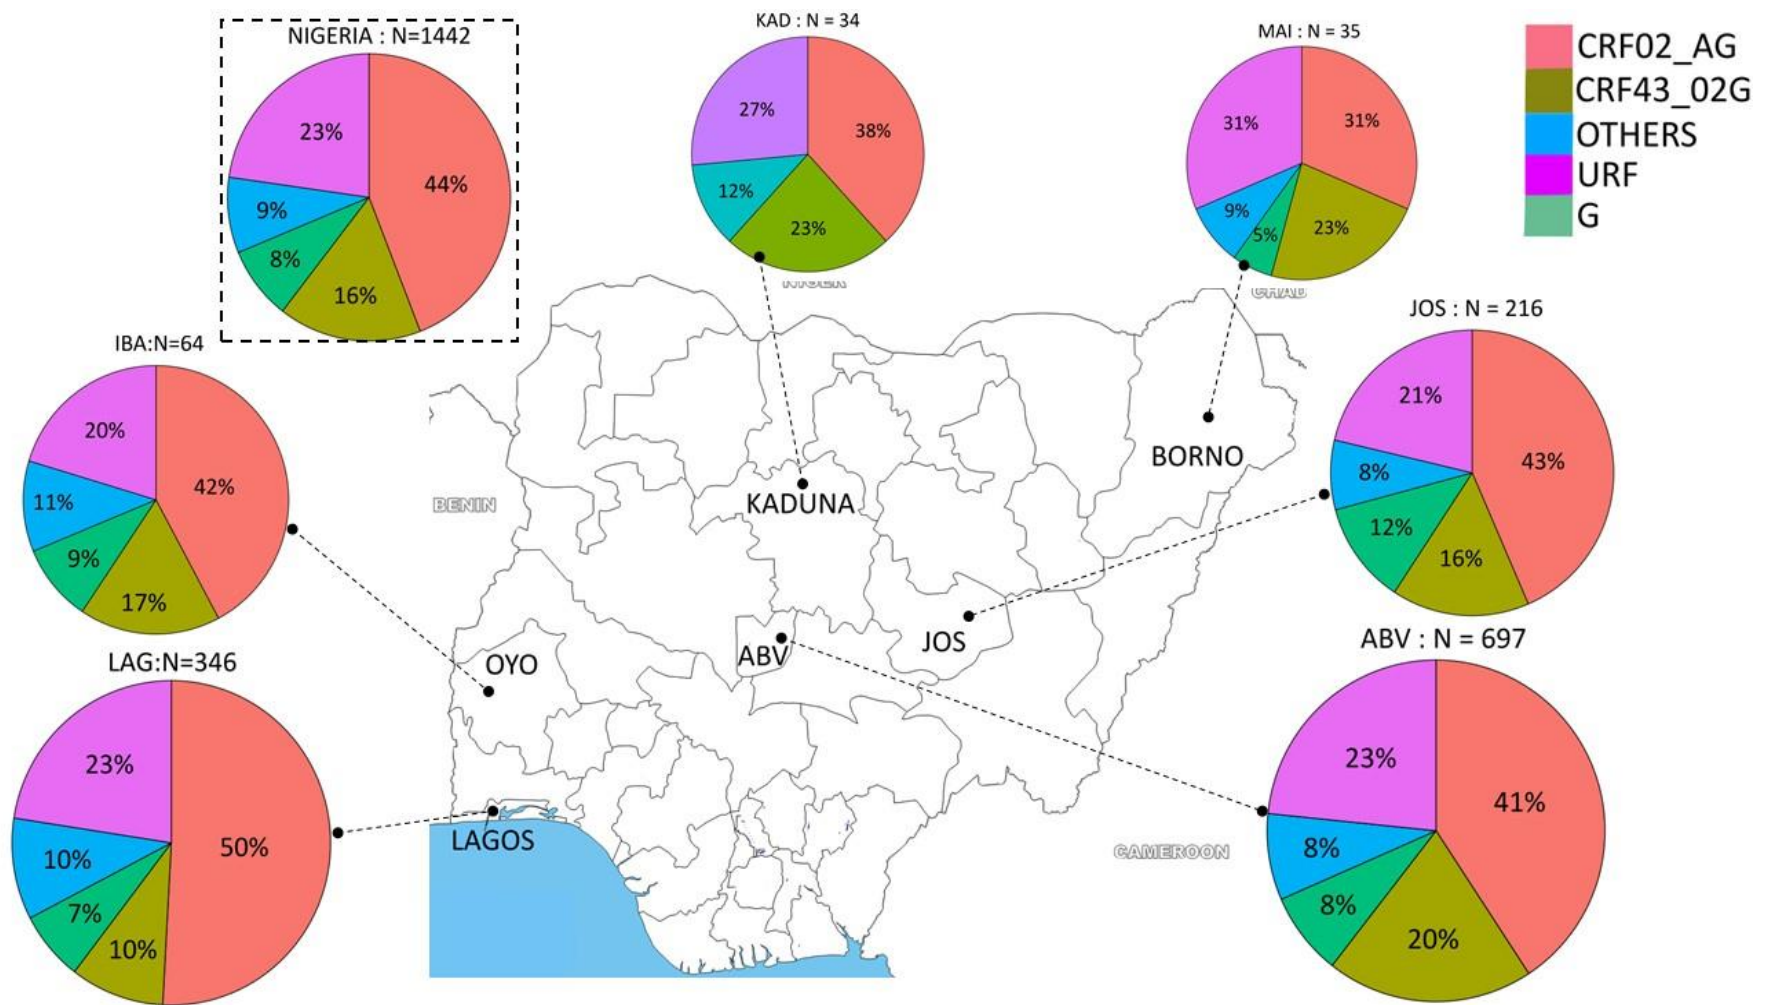

3

Figure 2. Dynamics of subtype/ CRF proportions, ART coverage and overall country HIV-1 prevalence over time.

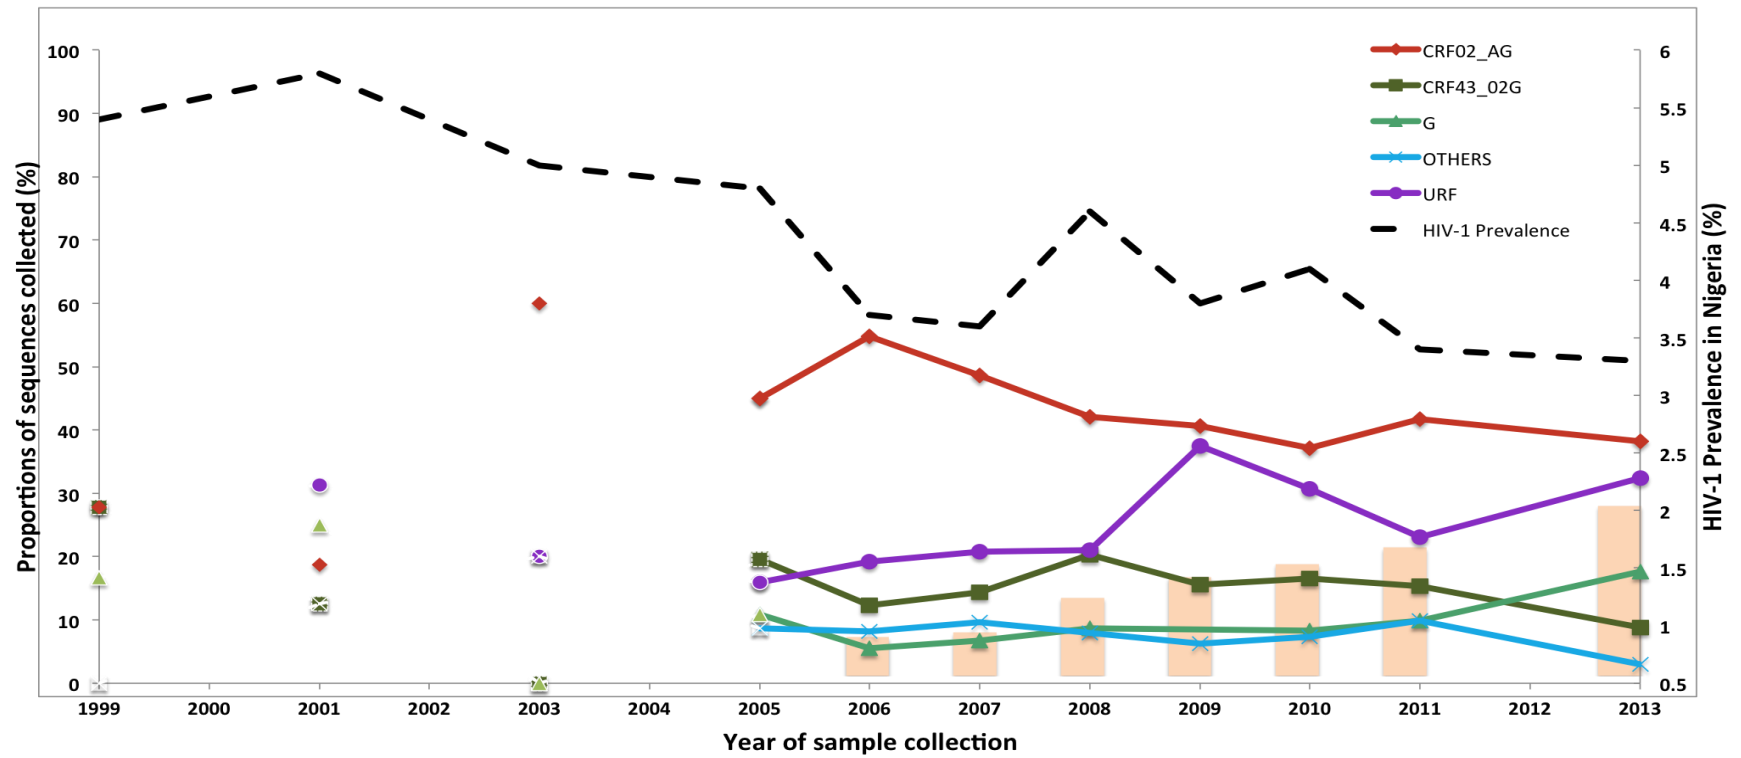



**Figure 3. Demographic history for the different Nigerian clusters.**

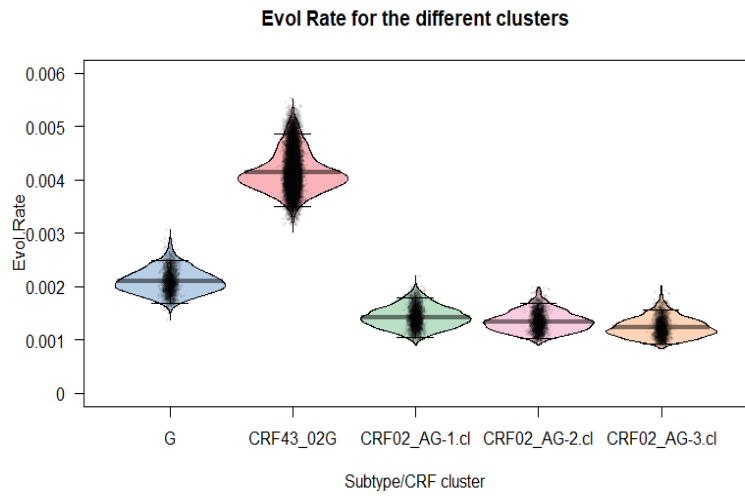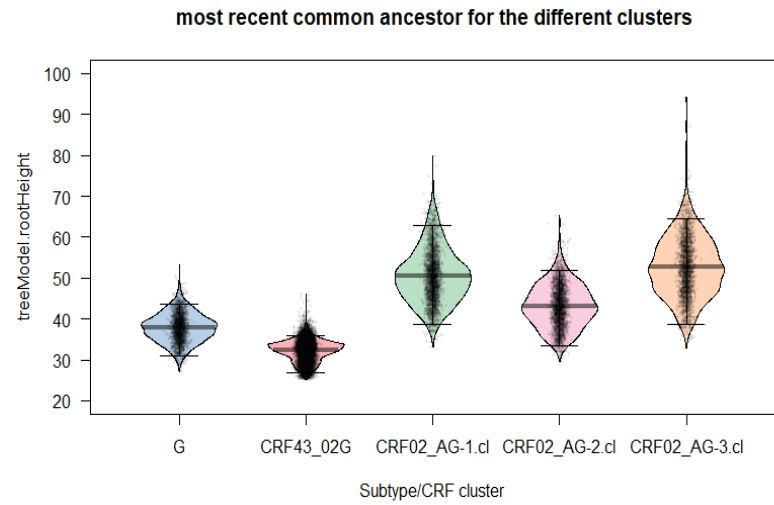

**Figure 4. Skygrid plots for the different clusters.**

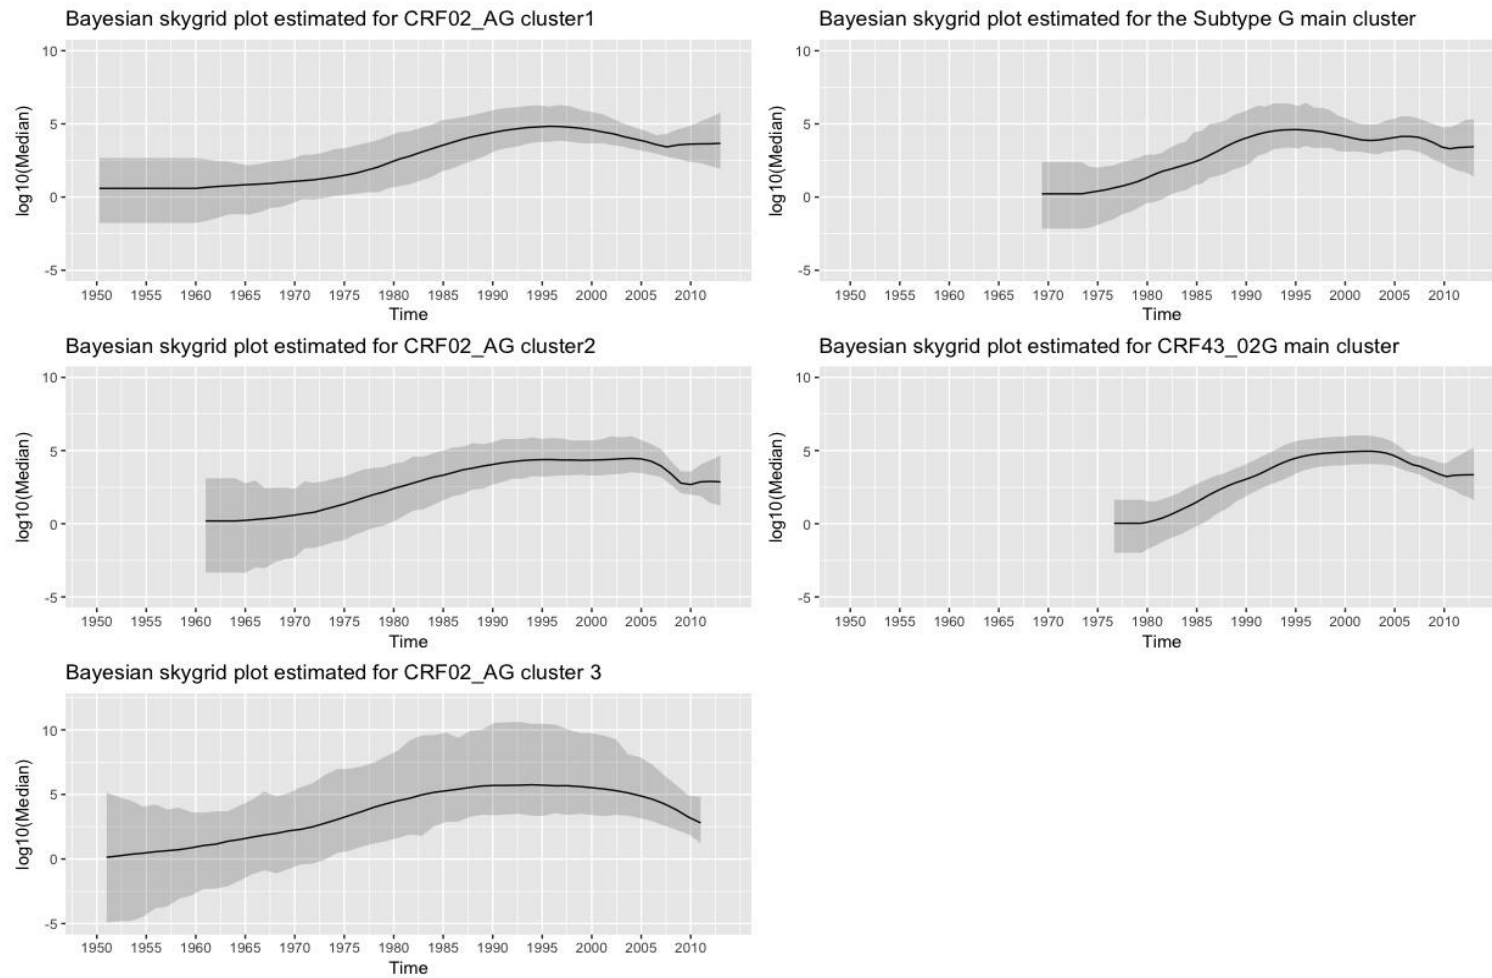

Figure 5. Estimated percentages of CRF02\_AG migration events from Abuja to each location in the NG, obtained using cluster

1.

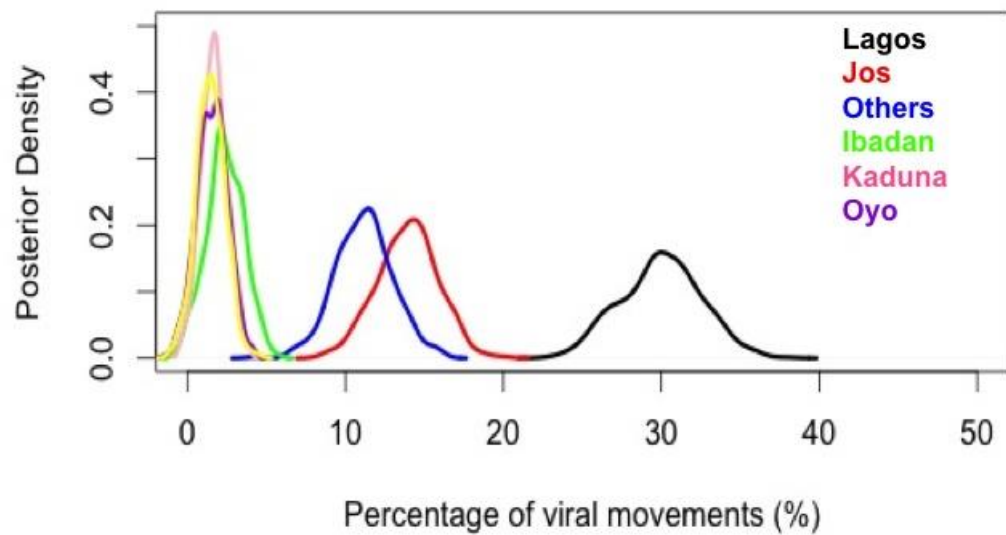

1 **SUPPLEMENTARY DATA**

2

3 **Characterisation of the HIV-1 Molecular Epidemiology in Nigeria: Origin, Diversity,**  
4 **Demography and Geographic Spread**

5

6 Jamirah Nazziwa<sup>a</sup>, Nuno Faria<sup>b</sup>, Beth Chaplin<sup>c</sup>, Holly Rawizza<sup>c</sup>, Patrick Dakum<sup>d</sup>, Alash'le

7 Abimiku<sup>d</sup>, Man Charurat<sup>d</sup>, Nicaise Ndembi<sup>d</sup> and Joakim Esbjörnsson<sup>a</sup>

8

9 Department of Laboratory Medicine, Lund University, Lund, Sweden<sup>a</sup>

10 Department of Zoology, University of Oxford, Oxford, United Kingdom<sup>b</sup>

11 Department of Immunology and Infectious disease, Harvard T.H School of Public Health,

12 Boston, USA<sup>c</sup>

13 Institute of Human Virology, Abuja, Nigeria<sup>d</sup>

1 **Files in this Data Supplement**

2 Supplementary Table 1. Summary of the median, mean and interquartile ranges for the 4  
3 hotspot regions in the pol alignment using the univariate K-means clustering Algorithm

4

5 Supplementary Figure 1. Potential recombination breakpoint hotspots detected in the pol  
6 alignment

7

8 Supplementary Figure 2. Optimal cluster determined by the gap statistic method

9

10 Supplementary Figure 3. Maximum likelihood phylogenetic tree for Subtype G sequences

11

12 Supplementary Figure 4. Maximum likelihood phylogenetic tree for CRF02\_AG sequences

13

14 Supplementary Figure 5. Maximum likelihood phylogenetic tree for CRF43\_02G sequences

15

16 Supplementary Figure 6. Groups of sequences with similar recombination breakpoint

17

18 Legends for supplementary figures

1 **SUPPLEMENTARY TABLES**

2 **Supplementary Table 1. Summary of the median, mean and interquartile ranges for**

3 **the four hotspot regions in the *pol* alignment using the univariate K-means clustering**

4 **Algorithm.**

|         | I      | II     | III    | IV     |
|---------|--------|--------|--------|--------|
| N       | 221    | 203    | 115    | 116    |
| Min.    | 147.00 | 415.00 | 656.00 | 864.00 |
| 1st Qu. | 294.00 | 503.00 | 729.00 | 931.00 |
| Median  | 305.00 | 522.00 | 768.00 | 948.00 |
| Mean    | 306.38 | 519.96 | 760.44 | 941.24 |
| 3rd Qu. | 312.00 | 533.00 | 805.00 | 957.25 |
| Max.    | 398.00 | 633.00 | 858.00 | 980.00 |

5

6

1 **SUPPLEMENTARY FIGURES**

- 2 **Supplementary Figure 1. Potential recombination breakpoint hotspots detected in the**  
3 ***pol* alignment.**

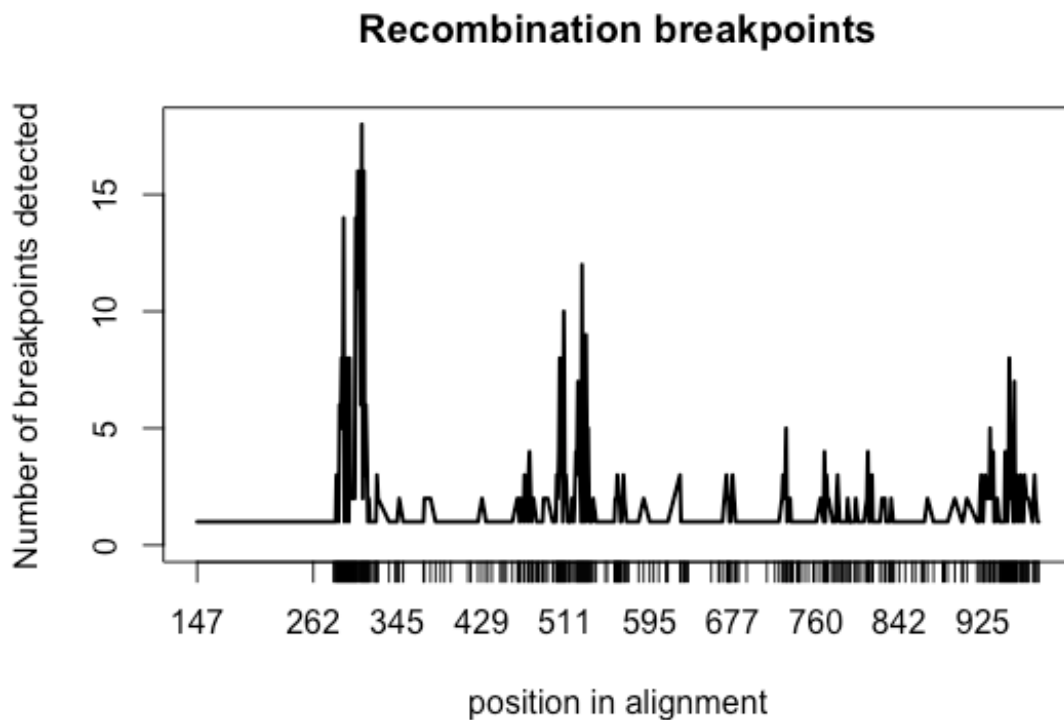

4

5

# 1 **Supplementary Figure 2. Optimal cluster determined by the gap statistic method**

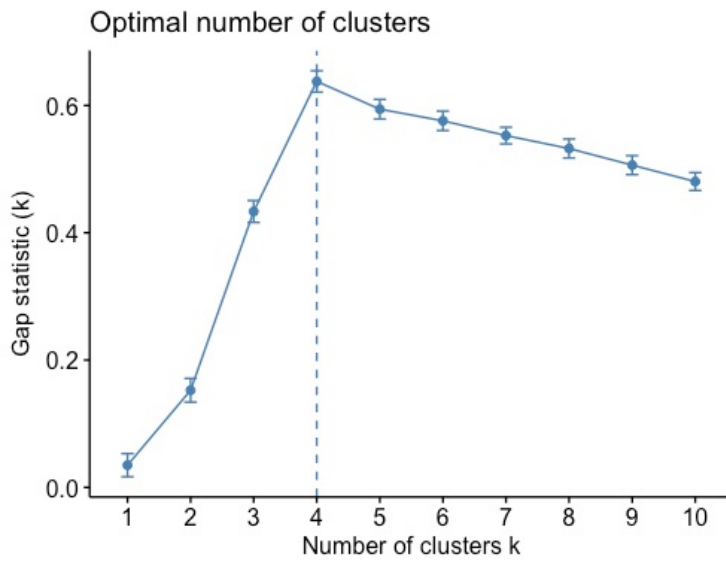

2

3



1 **Supplementary Figure 3. Maximum likelihood phylogenetic tree of the Subtype G**  
2 **sequences (n = 203).**

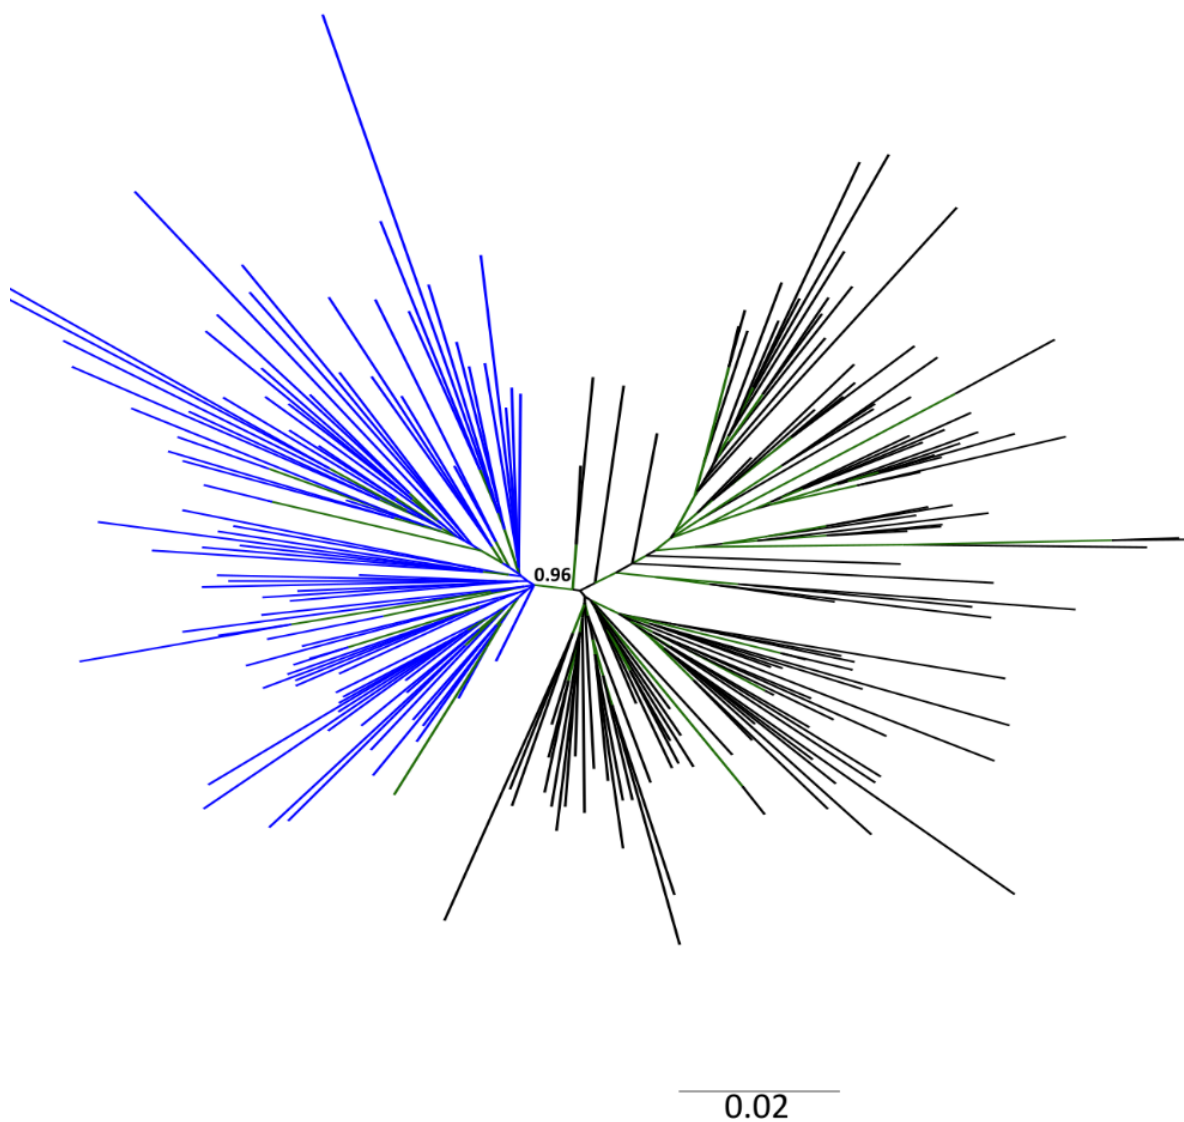

3

1 **Supplementary Figure 4. Maximum likelihood phylogenetic tree for CRF02\_AG**  
2 **sequences (n = 1170).**

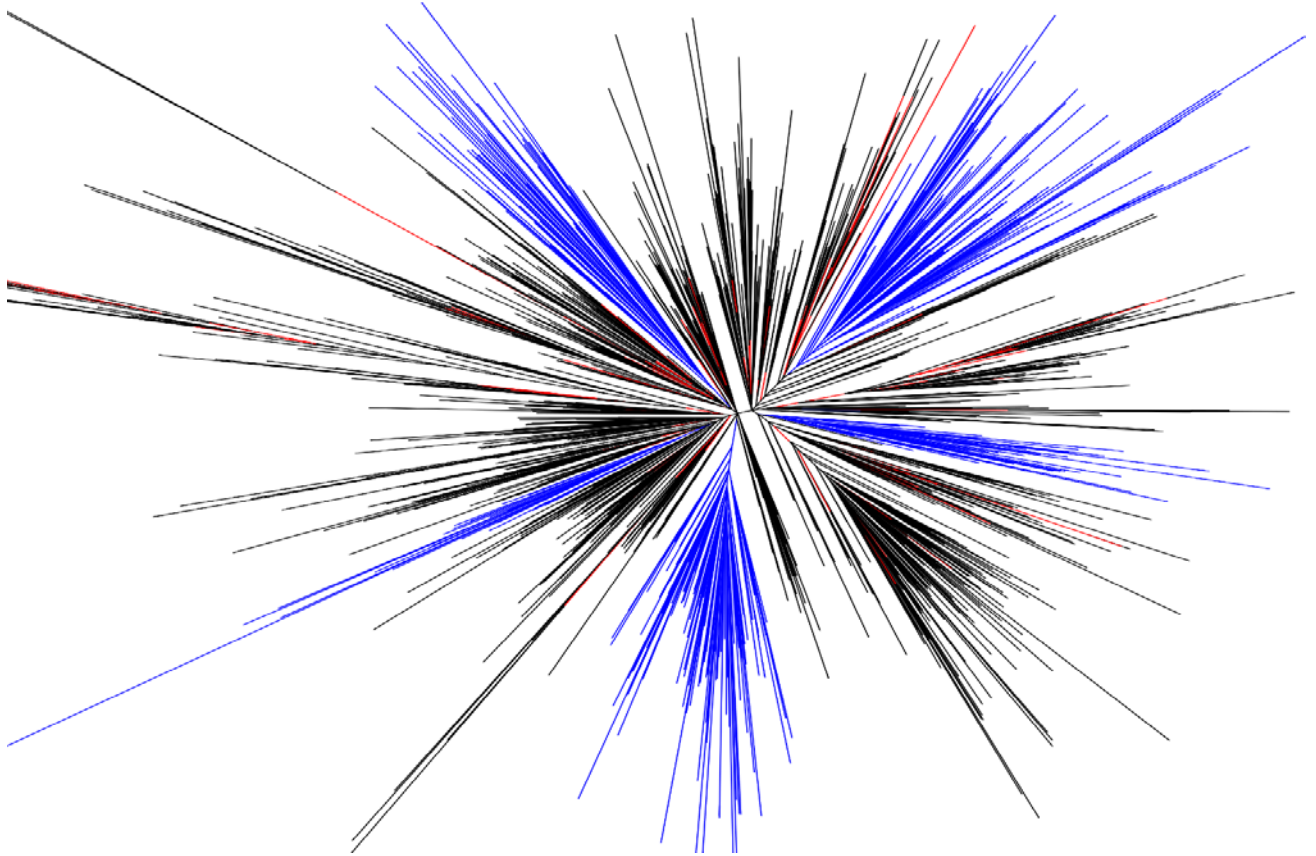

3

4

1 **Supplementary Figure 5. Maximum likelihood phylogenetic tree for CRF43\_02G**  
2 **sequences (n = 667).**

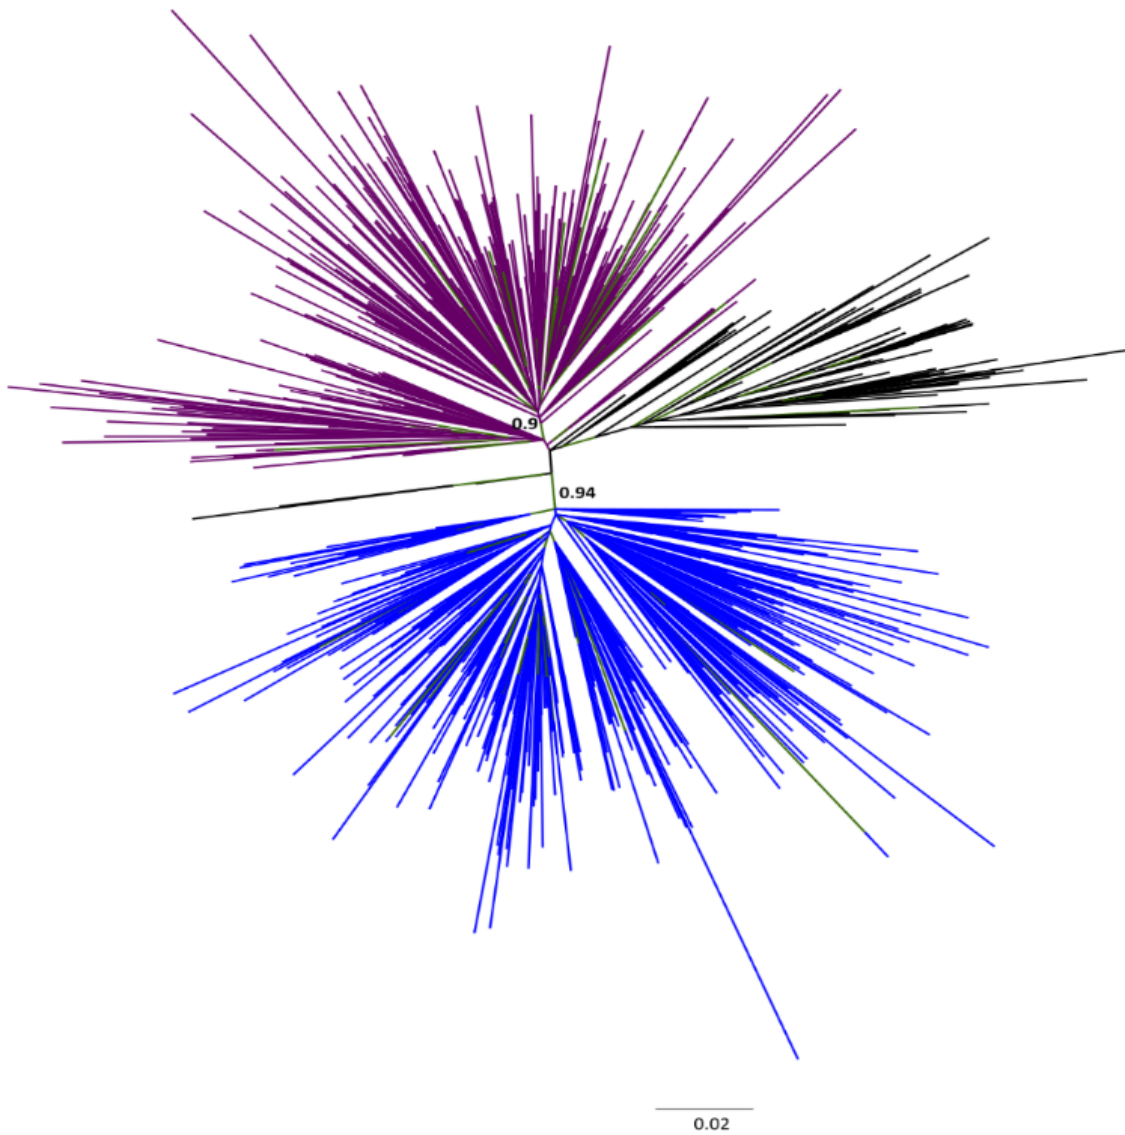

3

4

- 1 **Supplementary Figure 6. Groups of sequences with similar recombination breakpoint**
- 2 **patterns that could be potential new CRFs.**

1 **SUPPLEMENTARY FIGURE LEGENDS**

2 **Supplementary Figure 1. Potential recombination breakpoint hotspots detected in the**  
3 **pol alignment.** Small vertical lines at the bottom of the graph indicate breakpoint positions  
4 along the alignment. Breakpoints detected in each window of 300 nucleotides along the  
5 alignment were counted and plotted (solid line).

6  
7 **Supplementary Figure 2. Optimal cluster determined by the gap statistic method.** The  
8 gap statistic compares the total intra-cluster variation for different values of k with their  
9 expected values under null reference distribution of the data. This plot provides the gap  
10 statistic and standard error, identifying k=4 as the optimal cluster with the highest gap  
11 statistic.

12  
13 **Supplementary Figure 3. Maximum likelihood phylogenetic tree of the pol region for**  
14 **Subtype G sequences (n = 203).** The blue braches indicate Nigerian sequences while the  
15 green indicate an SH-aLRT branch support above 0.9. The black branches indicate the non-  
16 Nigerian sequences. We observed one large NG cluster (in blue) that was considered for  
17 further analysis

18  
19 **Supplementary Figure 4. Maximum likelihood phylogenetic tree for CRF43\_02G**  
20 **sequences (n = 667).** The blue braches indicate Nigerian sequences while the green indicate  
21 an SH-aLRT branch support above 0.9. The black branches indicate the non-Nigerian  
22 sequences. We observed one large NG cluster (in blue) that was considered for further  
23 analysis. The purple sequences were later classified as URFs

24

- 1 **Supplementary Figure 5. Maximum likelihood phylogenetic tree for CRF02\_AG**
- 2 **sequences (n = 1170).** The blue braches indicate Nigerian sequences while the green indicate
- 3 an SH-aLRT branch support above 0.9. The black branches indicate the non-Nigerian
- 4 sequences. We observed 3 large Nigerian clusters (in blue) that were considered for further
- 5 analysis.
- 6
- 7 **Supplementary Figure 6. Groups of sequences with similar recombination breakpoint**
- 8 **patterns that could be potential new CRFs.**
